# Supplementary material for: Combined Transcriptome and Proteome Analysis Reveals the Molecular Mechanism by Which ZmPDI Improves Salt Resistance in Rice (Oryza sativa)
Source: MDPI journal article supplement (doi:10.3390/agriculture14040615), 2024-04-15
Supplement: s1 [file s1]

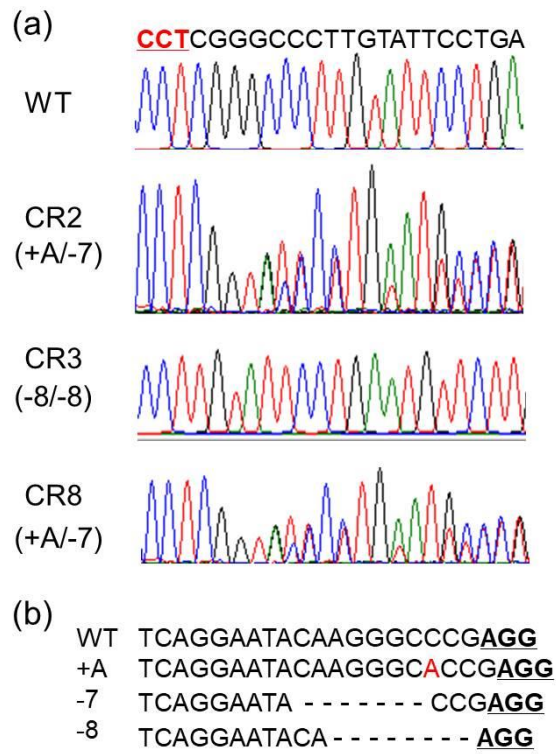

**Figure S1.** Mutations of the target site in *OsPDI* knock-out transgenic plants  
(a) Sequencing results of the target sites, red bold letters indicated the PAM, the genotype of each lines were under the lines names in brackets. (b) The genotype of each mutation.

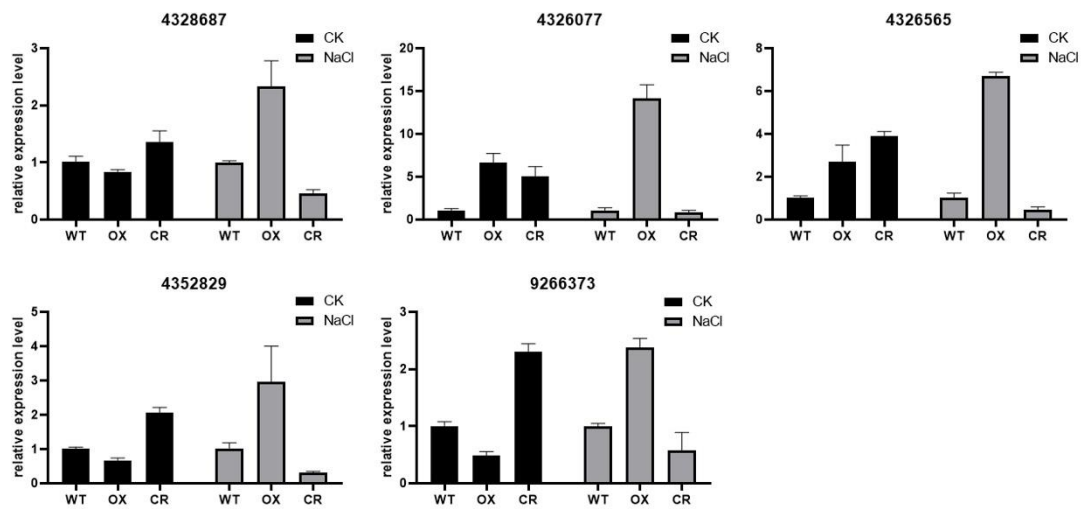

**Figure S2.** The relative expression levels of 5 randomly selected genes detected by qRT-PCR

(a)

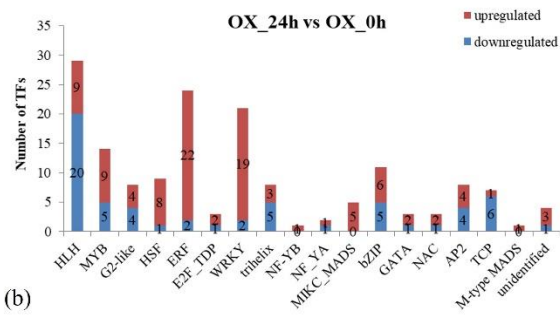

(b)

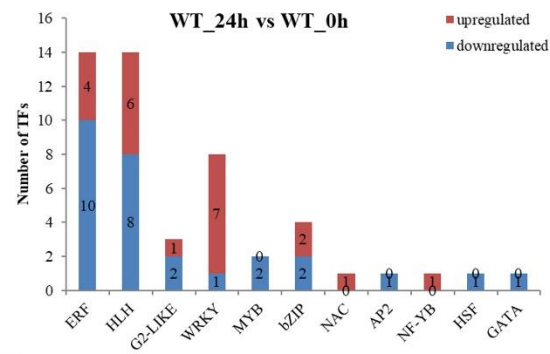

(c)

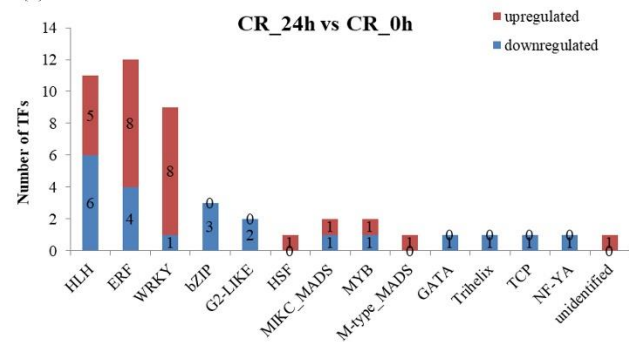

**Figure S3.** TFs of DEGs in OX\_24h vs OX\_0h (a), WT\_24h vs WT\_0h (b) and CR\_24h vs CR\_0h (c) comparison.

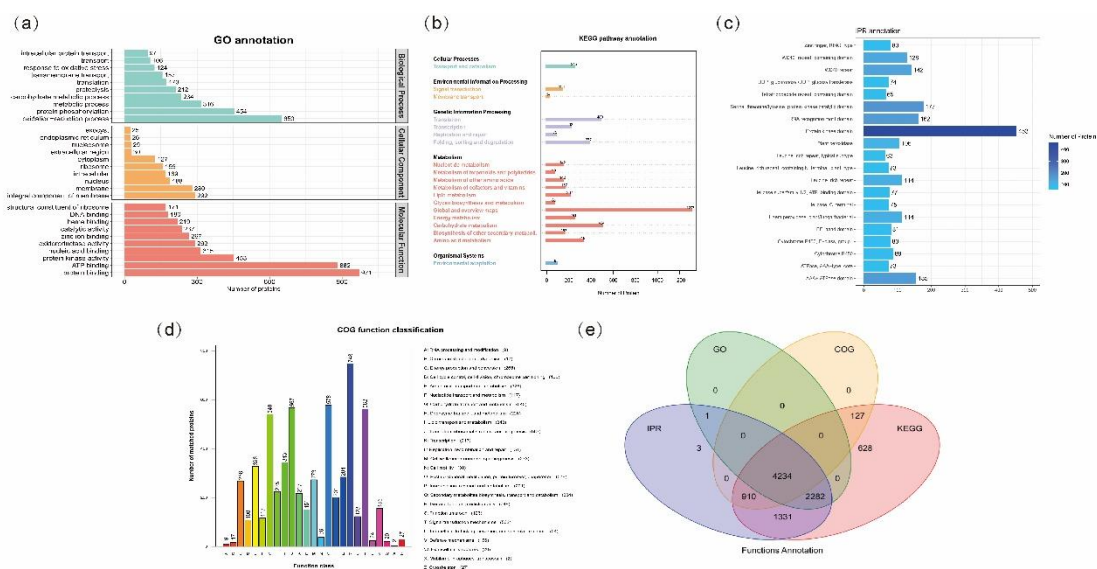

**Figure S4.** GO (a), KEGG (b), IRP (c) and COG (d) annotation of identified proteins, and venn diagram of them (e).

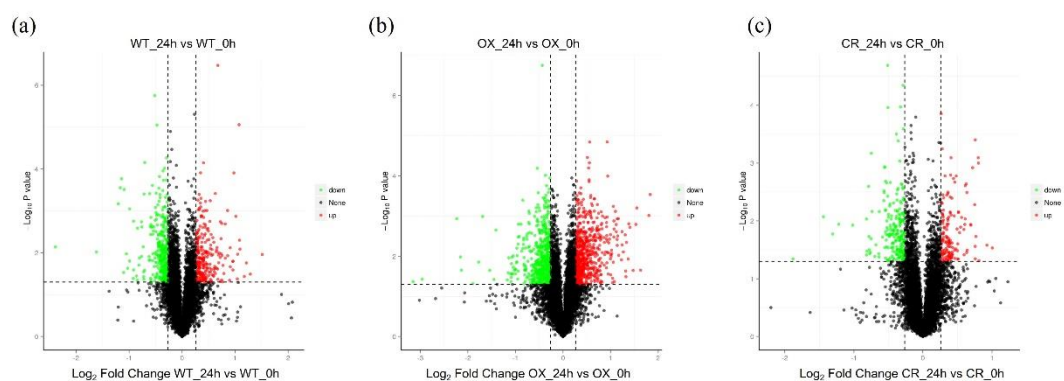

**Figure S5.** The volcano map of DEPs in WT\_24h vs WT\_0h (a), OX\_24h vs OX\_0h (b), and CR\_24h vs CR\_0h (c) comparison.

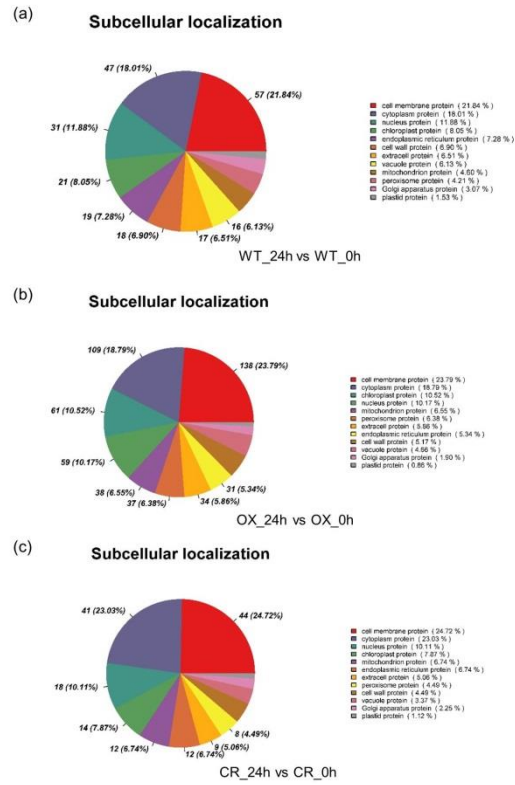

**Figure S6.** The subcellular location of DEPs in WT\_24h vs WT\_0h (a), OX\_24h vs OX\_0h (b), and CR\_24h vs CR\_0h (c) comparison.

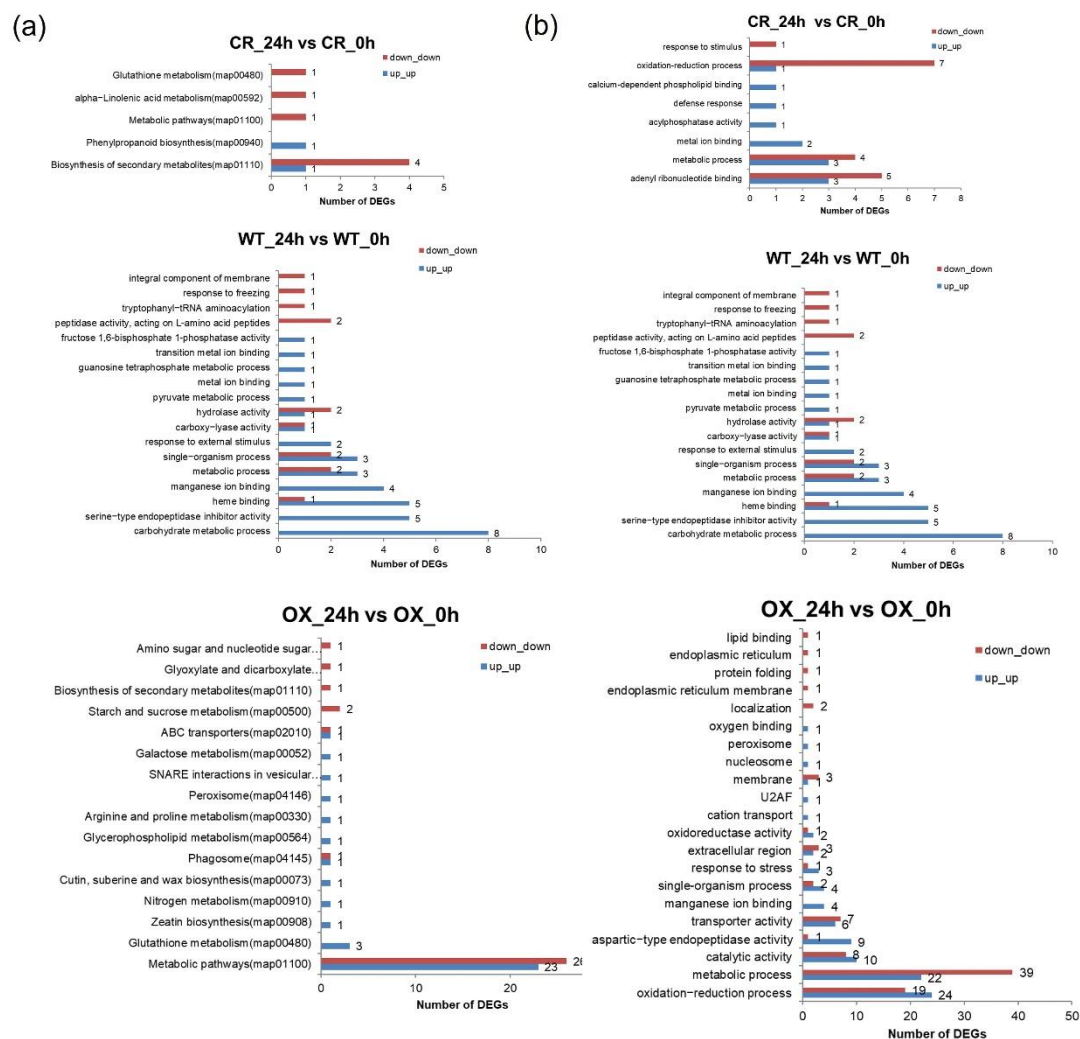

**Figure S7.** The GO terms (a) and KEGG pathways (b) of DEGs with consistent tendency at RNA and protein level in 3 comparisons.

|           |                                                                         |     |
|-----------|-------------------------------------------------------------------------|-----|
| OsI_04426 | -----MAKHFLVLTGAKIPSVGLGTWQSDPGVVGDVYAAVKAGYRHIDCARM                    | 48  |
| AKR4C14   | -----MAKHFLVLTGAKIPSVGLGTWQSDPGVVGNVYAAVKAGYRHIDCASA                    | 48  |
| OsI_04429 | -----MATHFTLTNGARIPSVGLGTWKAGTGVVADVSAAVKAGYRHIDCAPL                    | 48  |
| AKR4C10   | MAGRAGRRRQCRLRRRQGDVALSEFNDKLIFFHVSFVLSEFSRRLIFHVLCCINCMLLQAGYRHIDCAQA  | 70  |
| OsI_04426 | YKNEKEVGLALKKLFEEGVVKREDLFITSKLWCDHAPEDVPESLDKTLSDLQLEBYLDLYLIHWPFRRVKK | 118 |
| AKR4C14   | YKNEKEVGLALKKLFEEGVVKREDLFITSKLWCDHAPEDVPEALDATLNDLQLEBYLDLYLIHWPFRTKK  | 118 |
| OsI_04429 | YKNEKEIGGALKKLFDDGVVKREDLFITSKLWCDLAPEDVPLAMDSTLKDLQLDYVDLYLIHWPFQIKK   | 118 |
| AKR4C10   | YFNEKEIGVALKKVFDEGVVKREDLFITSKLWCTNHAPEDVPVALDSTLQDLQTDYVDLYLIHWPFVRMKK | 140 |
| OsI_04426 | GSGISNTEDYIPDPDIPSTWGAMEKLYDSGKSRAIGVSNFSSKKLGDLLAVACVPPAVDQVECHPGWQQTK | 188 |
| AKR4C14   | GSSI GKPSYLPDPDIPSTWAAMEKLYDSGKSRAIGVSNFSSKKLGDLAAARVPPAVDQVECHPGWQQMK  | 188 |
| OsI_04429 | GTELSPENFVKPDIPSTWRAMEQLYDSGKARAIGVSNFSSKKLGDLCCVARVPPAVDQVECHPGWQQAK   | 187 |
| AKR4C10   | GAGFGGQNVLETDIPATWAAMEKLYDSGKARAIGVSNFSSKKLEDLLAVARVPPAVDQVECHPVWQQTK   | 209 |
| OsI_04426 | LHNFCQSTGVHLSAYSPLGSP--GSTWMNSNVLKESVITISIAEKLGKTPAQVALHWNTQMCHSVLPKSVT | 256 |
| AKR4C14   | LHNFCQSTGIHLSAYSPLGSP--GSTFMNGNVLKEPITISIAEKLGKTPAQVALRWNTQMCHSVLPKSVS  | 256 |
| OsI_04429 | LRAFCHTSGVHLSAYAPLG-----RMKGIAVDSVLPVAEMLGRTPAQVALRWGLQQGQSVLPKSVS      | 249 |
| AKR4C10   | LRKFCTSKGIHLSAYSPLGSPGTASVKAVGNVLAHPVVVSTAEKLGKTPAQVALRWGTQMCHSVLPKSTH  | 279 |
| OsI_04426 | EERIKQNTDVYDWSIPEDLLVKEFSEIKQVRLLRGDIVNPHSVYKTHEELWDGEI                 | 311 |
| AKR4C14   | EERIKQNTDVYDWSIPEDLLAKFSEIKQVRLLRGNFIVNPQSVYKTHEELWDREI                 | 311 |
| OsI_04429 | EARKENMDLFCWSIPEELCAKLSEIEQVQIRGDFGAHPESVYKTYEELFDGEI                   | 304 |
| AKR4C10   | EERIKENTDVYDWSIPEDLFIKLEIEQMKLIRGEFWTHPEGVYKSTIEELWDGEI                 | 334 |

**Figure S8.** The alignments of AKR4C10 and several known AKR4C members in rice.

The protein sequences were downloaded from Rice Genome Annotation Project (<http://rice.uga.edu/index.shtml>): AKR4C14 (locus identifier: LOC\_Os01g62870), OsI\_04426 (locus identifier: LOC\_Os01g62860), OsI\_04429 (locus identifier: LOC\_Os01g62880), and AKR4C10 (locus identifier: LOC\_Os05g38230).
