# Supplementary material for: Combined Transcriptome and Proteome Analysis Reveals the Molecular Mechanism by Which ZmPDI Improves Salt Resistance in Rice (Oryza sativa)
Source: MDPI journal article supplement (doi:10.3390/agriculture14040615), 2024-04-15
Supplement: s1 [file s1]

Supplementary TableS1. Primers used in this study

| Primer name             | Primer sequence(5'-3')                           | Use                                                              |
|-------------------------|--------------------------------------------------|------------------------------------------------------------------|
| Os12g0623600-RT-F1      | GTTGATCCTGAGCCTGCCTTAA<br>GGACTGATGTATCACATGGTGC | RT-PCR                                                           |
| Os12g0623600-RT-R1      | TGTA<br>CAGGACTTCCCCTACTCCCCT                    | RT-PCR                                                           |
| Os03g0655100-RT-F1      | G                                                | RT-PCR                                                           |
| Os03g0655100-RT-R1      | GCATCCTGCTGATCTGCTCGTC                           | RT-PCR                                                           |
| LOC_Os02g11760-RT-F1    | GGCATGGACACTGTACGGACTT<br>ACGGCAGTTGCTACATAACCTA | RT-PCR                                                           |
| LOC_Os02g11760-RT-R1    | A<br>GCGAGTGCCAGGTTTCAGTTGTC                     | RT-PCR                                                           |
| Os01g0118400-RT-F1      | C                                                | RT-PCR                                                           |
| Os01g0118400-RT-R1      | CTATGCCTGTGCCGTTGGGTTG                           | RT-PCR                                                           |
| LOC_Os01g45550-RT-F1    | TGCCGCTGTACGTGGCGATGTT<br>CGTTGGTGGAGATGAAGTGGAA | RT-PCR                                                           |
| LOC_Os01g45550-RT-R1    | GG                                               | RT-PCR                                                           |
| OsActin-RT-F1           | CAGCACATTCCAGCAGAT                               | RT-PCR                                                           |
| OsActin-RT-R1           | GGCTTAGCATTCCTTGGGT                              | RT-PCR                                                           |
| pCAMBIA1305.2-ZmPDI-F1  | CTCATAAATAACGTCATGCATA<br>TGGCGATCCACTCCAGGG     | Construction of plant expression vector<br>Pcambia1305.2-ZMPDI   |
| pCAMBIA1305.2-ZmPDI-R1  | CTCATAAATAACGTCATGCATG<br>AGCTCATCCTTGACGGCC     | Construction of plant expression vector<br>Pcambia1305.2-ZMPDI   |
| pYLCRISPR/Cas9-OsPDI-F1 | AGCATGAACAGTCGGAACAGA                            | Construction of plant expression vector<br>pYLCRISPR/ Cas9-OSPDI |
| pYLCRISPR/Cas9-OsPDI-R1 | AGAAGCTCGCTCCAGAGGTA                             | Construction of plant expression vector<br>pYLCRISPR/ Cas9-OSPDI |
| LOC_Os11g09280-F        | AGCATGAACAGTCGGAACAGA                            | amplify and sequence the target site of<br>OSPDI                 |
| LOC_Os11g09280-R        | AGAAGCTCGCTCCAGAGGTA                             | amplify and sequence the target site of<br>OSPDI                 |
| Hyg-F                   | GAAAAAGCCTGAACTCACCGC                            | determination of the overexpressional<br>transgenic plant        |
| Hyg-R                   | TGCTCCATACAAGCCAACCAC                            | determination of the overexpressional<br>transgenic plant        |
